# Supplementary material
Source: Springer Nature journal article supplement (https://www.springermedizin.de/resource/supplementary/12913_2014_3698_MOESM6_ESM.docx/9533220)
Supplement: MOESM6 [file 9533220]

**Figure 9: Statistical Analysis Scenario 1 – Scenario 3 2026**
